# Supplementary material for: Modulating phase composition and crystallization of 2D Ruddlesden–Popper perovskite films via a polyvinylidene fluoride buried interface
Source: Royal Society of Chemistry journal article supplement (doi:10.1039/d5ra06360d), 2025-01-01
Supplement: d5ra06360d1.pdf [file d5ra06360d1.pdf]

## Modulating Phase Composition and Crystallization of 2D Ruddlesden–Popper Perovskite Films via a Polyvinylidene Fluoride Buried Interface

Juan Meng<sup>1,2</sup>, Qiyou Lai<sup>1</sup>, Sen Yang<sup>1</sup>, Chunying Wei<sup>1</sup>, Jingwen Li<sup>1</sup>, Jiaqing Huang<sup>1,2</sup>, Qi Lan<sup>1,2</sup>, Leilei Yang<sup>1,2\*</sup>, Di Huang<sup>\*3</sup>, and André D. Taylor<sup>4</sup>

1 School of physics and electronic information, Guangxi Minzu University, Nanning, 530006, China

2 University Engineering Research Center of Multi-modal Information Intelligent Sensing, Processing and Application of Guangxi, Nanning, 530006, China

3 Hunan University of Technology, Zhuzhou 412008, China

4 Department of Chemical and Biomolecular Engineering, Tandon School of Engineering, New York University, New York, NY 11201, USA

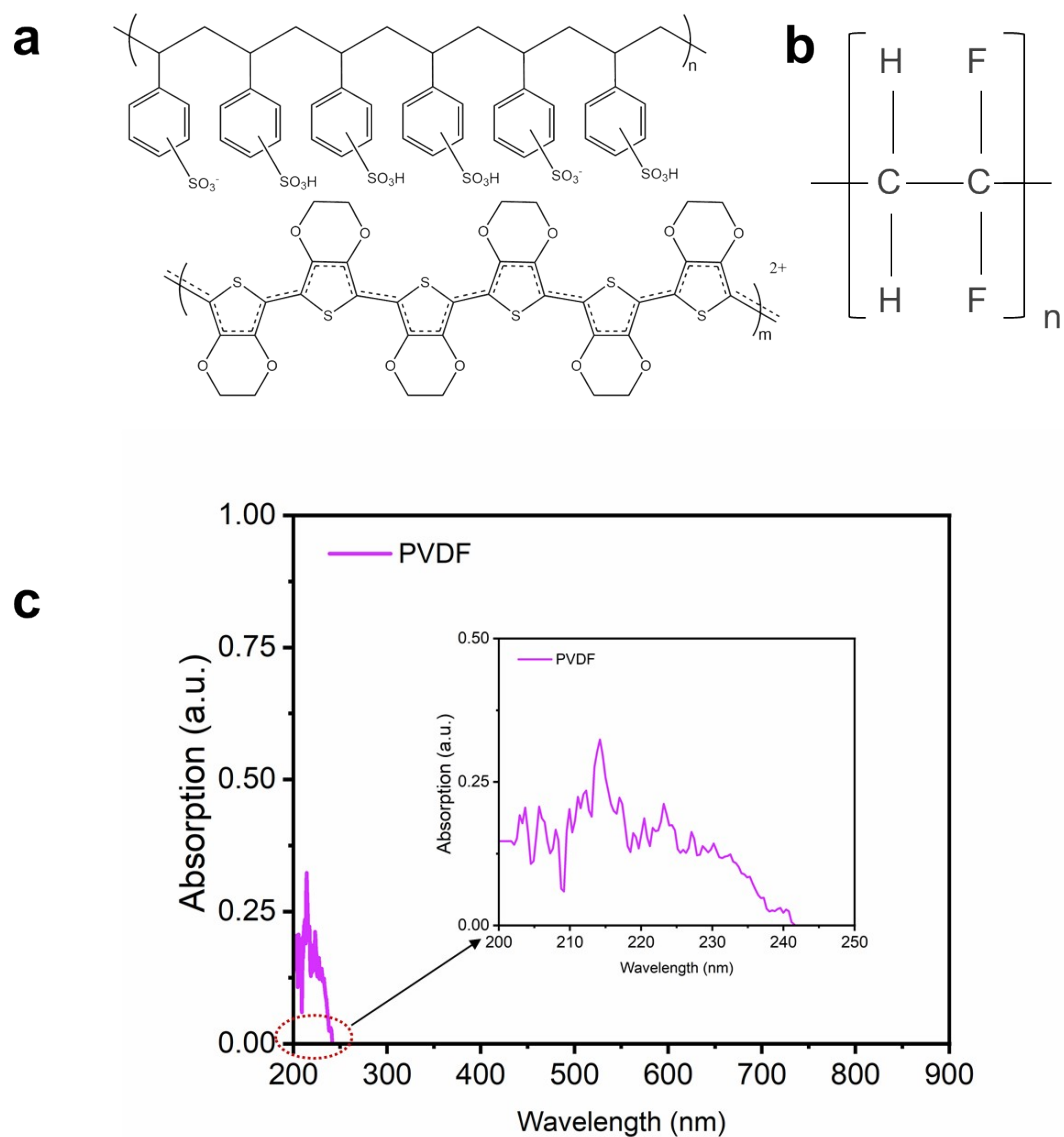

Figure S1(a-b) The chemical structure of PEDOT:PSS and PVDF, (c) The UV-vis absorption spectrum of PVDF onto Quartz, inset Figure shows the absorption spectrum of 200-250nm PVDF.

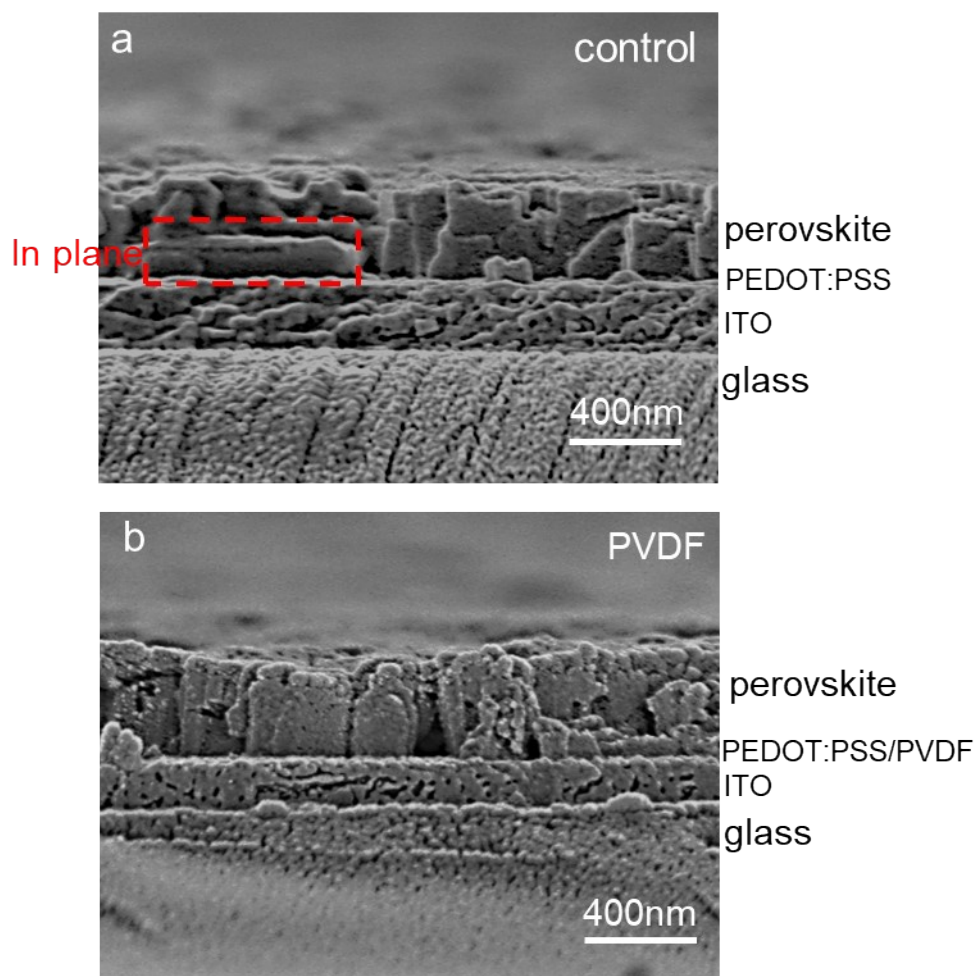

**Figure S2** The cross-sectional SEM of perovskite fabricated onto different substrates.

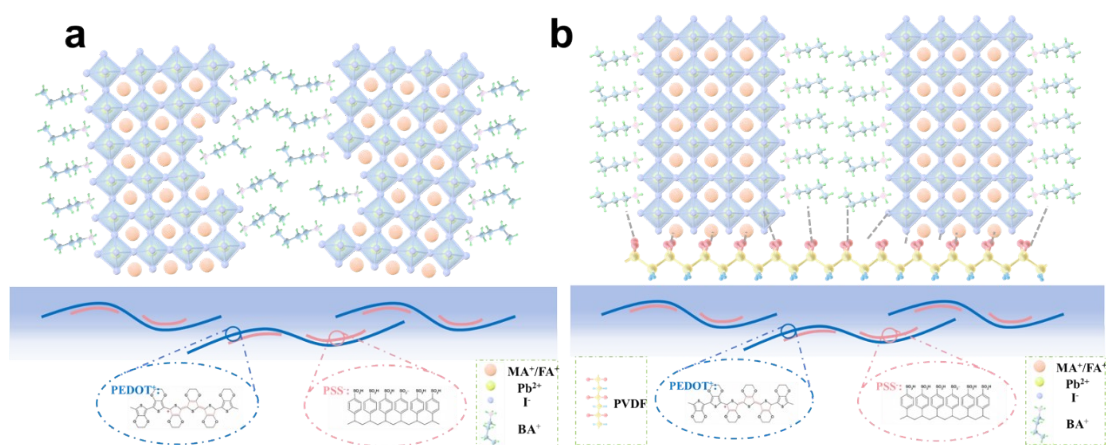

**Figure S3** Schematic illustration of the interaction between PVDF and perovskite: (a) perovskite onto PEDOT:PSS, (b) perovskite onto PVDF/PEDOT:PSS.

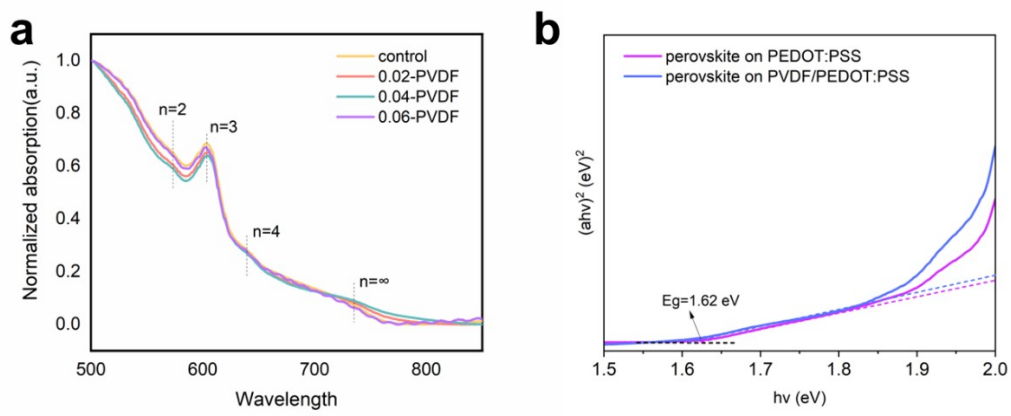

**Figure S4 (a)** The absorption of perovskite on PVDF/PEDOT:PSS, where the concentration of PVDF are 0.02 mg/ml (0.02-PVDF), 0.04mg/ml (0.04PVDF) and 0.06g/ml (0.06 PVDF), respectively. (b) The optical bandgaps of perovskite on PEDOT:PSS and 0.04mg/ml PVDF onto PEDOT:PSS.

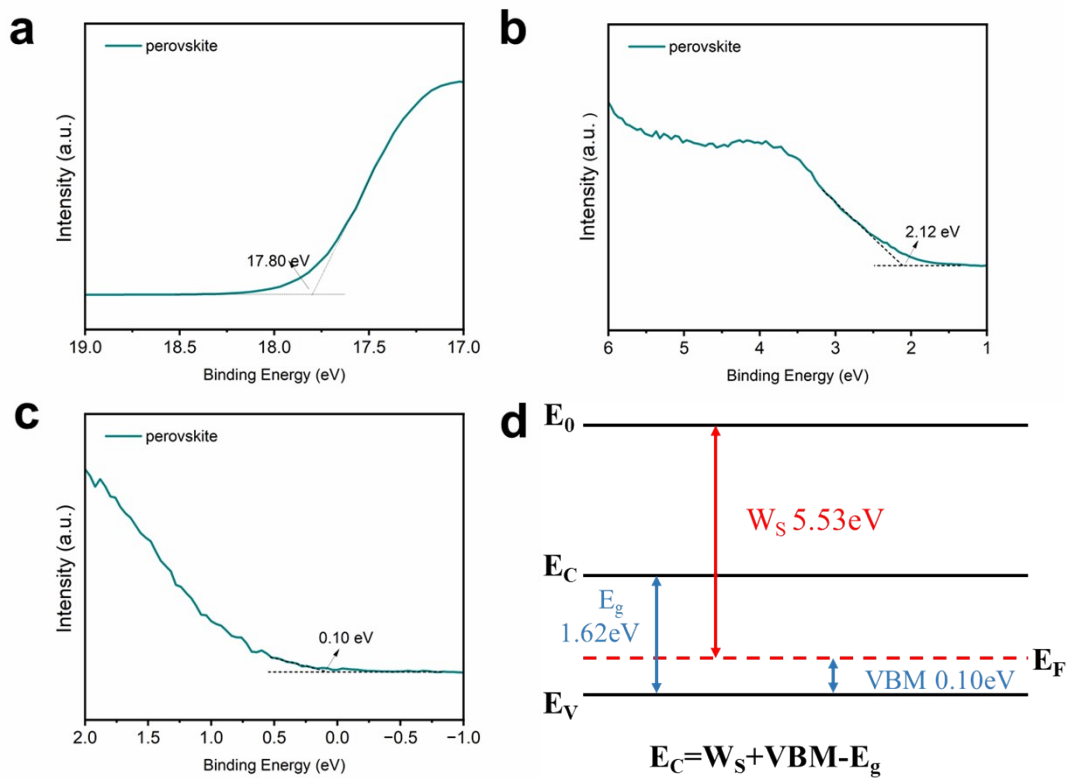

Figure S5 The UPS data of the perovskite film. (a) cutoff ( $E_{\text{cut-off}}$ ) and (b) onset ( $E_i$ ). (c) Valence band. (d) Schematic energy level diagram of the 2D RPP layer.

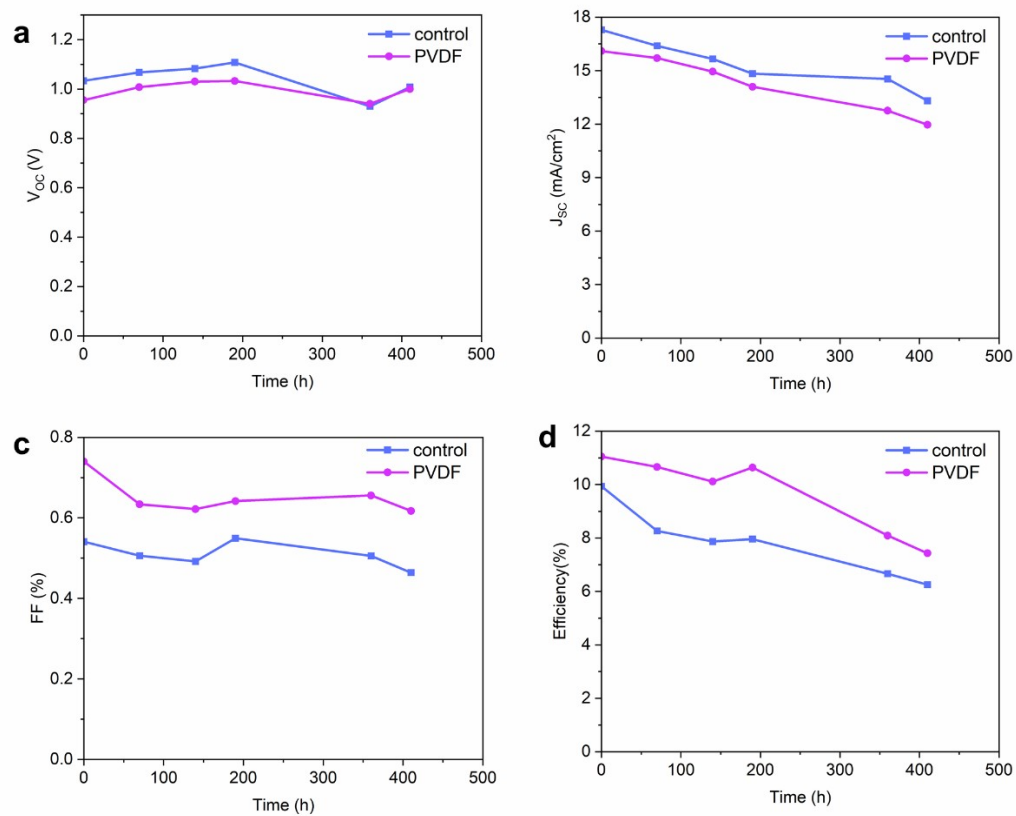

Figure S6 The stability of unsealed 2D PSCs based on PEDOT:PSS and PVDF/PEDOT:PSS which keep in the air at dark condition.
